# Supplementary material for: Comparison of tumor-infiltrating lymphocytes of breast cancer in core needle biopsies and resected specimens: a retrospective analysis
Source: Springer Nature journal article supplement (doi:10.1007/s10549-018-4842-7), 2018-06-05
Supplement: MOESM3 [file 15821360]

**Supplementary Table 2.** Univariate linear logistic regression analysis of clinicopathologic parameters influencing the difference in the tumor-infiltrating lymphocyte score between the core needle biopsy and resected specimen in the total patients

|  | Total (*N* = 208) | |
| --- | --- | --- |
|  | β±SE | *P* - value |
| Core numbers | -1.366±0.786 | 0.084 |
| Size of invasive cancer | -0.882±0.962 | 0.360 |
| Size of invasive and in situ carcinoma | -0.458±0.651 | 0.483 |
| CIS proportion | -0.002±0.043 | 0.954 |
| Average TV in Bx | 0.059±0.042 | 0.160 |
| Tumor mass in Bx | -0.295±0.667 | 0.659 |
| ER |  |  |
| Negative | Reference |  |
| Positive | -0.730±2.384 | 0.760 |
| PR |  |  |
| Negative | Reference |  |
| Positive | -0.624±2.103 | 0.767 |
| HER2 |  |  |
| Negative | Reference |  |
| Amplified | 3.501±2.652 | 0.188 |
| Ki-67 LI |  |  |
| < 14% | Reference |  |
| ≥ 14% | -0.233±2.018 | 0.908 |
| Histologic subtype |  |  |
| IDC | Reference |  |
| ILC | -1.761±4.012 | 0.661 |
| TC | -4.761±6.202 | 0.444 |
| Others | -3.397±4.639 | 0.465 |
| Histologic grade |  |  |
| I | Reference |  |
| II | 1.842±2.179 | 0.467 |
| III | 0.665±3.309 | 0.841 |
| Tumor phenotype |  |  |
| HR+ | Reference |  |
| HER2 | 3.370±1.217 | 0.214 |
| TNBC | -0.742±2.901 | 0.798 |

SE, standard error; CIS, carcinoma in situ; TV, tumor volume; Bx, biopsy; ER, estrogen receptor; PR, progesterone receptor; HER2, human epidermal growth factor receptor 2; LI, labeling index; IDC, invasive ductal carcinoma; ILC, invasive lobular carcinoma; TC, tubular carcinoma; HR+, hormone receptor-positive; TNBC, triple-negative breast cancer.
