# Supplementary material for: Comparison of tumor-infiltrating lymphocytes of breast cancer in core needle biopsies and resected specimens: a retrospective analysis
Source: Springer Nature journal article supplement (doi:10.1007/s10549-018-4842-7), 2018-06-05
Supplement: MOESM5 [file 15821360]

**Supplementary Table 4**. Univariate linear logistic regression analysis of clinicopathologic parameters influencing the difference in the tumor-infiltrating lymphocyte score between the core needle biopsy and resected specimen according to molecular subtype

|  | HR+ (*N* = 150) | |  | HER2 (*N* = 38) | |  | TNBC (*N* = 32) | |
| --- | --- | --- | --- | --- | --- | --- | --- | --- |
|  | β±SE | *P* - value |  | β±SE | *P* - value |  | β±SE | *P* - value |
| Core numbers | -0.652±0.882 | 0.461 |  | 0.579±2.185 | 0.793 |  | -7.203±2.446 | 0.006 |
| Size of invasive cancer | 0.312±1.176 | 0.791 |  | 0.068±2.993 | 0.983 |  | -3.454±2.289 | 0.142 |
| Size of invasive and in situ carcinoma | -0.280±0.748 | 0.708 |  | -0.196±1.635 | 0.905 |  | -1.972±2.151 | 0.367 |
| CIS proportion | -0.017±0.050 | 0.738 |  | -0.031±0.079 | 0.699 |  | 0.698±0.501 | 0.174 |
| Average TV in Bx | 0.066±0.048 | 0.165 |  | 0.050±0.098 | 0.612 |  | 0.010±0.170 | 0.954 |
| Tumor mass in Bx | -0.189±0.810 | 0.816 |  | -0.456±1.604 | 0.778 |  | -0.439±1.945 | 0.823 |
| Histologic grade |  |  |  |  |  |  |  |  |
| I | Reference |  |  | Reference |  |  | Reference |  |
| II | 0.925±2.494 | 0.711 |  | NA |  |  | NA |  |
| III | 4.058±5.676 | 0.476 |  | -0.019±5.753 | 0.997 |  | -5.667±6.927 | 0.420 |

HR+, hormone receptor-positive; HER2, human epidermal growth factor receptor 2; TNBC, triple-negative breast cancer; SE, standard error; CIS, carcinoma in situ; TV, tumor volume; Bx, biopsy; NA; not applicable.
